# Supplementary material for: A Stochastic Inventory Model with Trade Credit
Source: Atypon-hosted journal article supplement (doi:10.1287/msom.1070.0191), 2008-01-05
Supplement: msom.1070.0191-sm-a_stochastic_inventory_model.pdf [file msom.1070.0191-sm-a_stochastic_inventory_model.pdf]

## Online Appendix

### PROOF OF LEMMA 1

We shall prove each claim in Lemma 1 by checking that the specified operations lead to membership in the correct set.

#### Part (a):

Let  $t^* = \max\{t : g(t) \geq g(s), \forall s\}$  be the largest unconstrained maximizer of  $g(\cdot)$ . Then,

$$g_1(s) = \begin{cases} g(t^*) & \text{if } s \leq t^*, \\ g(s) & \text{otherwise.} \end{cases}$$

Clearly,  $g_1(s) < \infty$  since  $g(\cdot)$  is bounded. Next, we consider three mutually exclusive and collectively exhaustive cases representing different values of  $s$  relative to  $t^*$  to verify that properties (2) and (3) in Definition 1 hold.

Since  $g_1(s) = g(t^*)$ , for any  $s \leq t^*$ , it follows that when  $s < t^*$ ,

$$g_1^+(s) = g(t^*) - g(t^*) = 0 = g_1^+(s-1).$$

Clearly,  $g_1(s)$  has properties (2) and (3) since  $g_1^+(s) \leq g_1^+(s-1)$  and  $g_1^+(s) = 0$  is bounded by any strictly positive  $\eta$ .

If  $s = t^*$ , then  $g_1^+(s) = g(s+1) - g(t^*) \leq 0$ , whereas  $g_1^+(s-1) = 0$ . The inequality in the previous sentence comes from the definition of  $t^*$ . Therefore,  $g_1^+(s) \leq g_1^+(s-1)$  and  $g_1^+(s) \leq 0$ , and once again it is shown to possess the desired properties.

Finally, suppose  $s > t^*$ . Here,

$$\begin{aligned} g_1^+(s) &= g(s+1) - g(s) = g^+(s) \\ &\leq g^+(s-1) = g(s) - g(s+1) \\ &= g_1^+(s-1) \end{aligned}$$

The inequality above follows from the fact that  $g \in \mathcal{G}$ . It also implies that there exists a  $\eta < \infty$  such that  $g^+(s) < \eta$ . Therefore, from above,  $g_1^+(s) < \eta$ , and this completes the proof of part (a).

Part (b):

Since  $f(\cdot) \in \mathcal{F}$ , the first property of functions in  $\mathcal{F}$  (see Definition 2) implies  $f_1(s) < \infty$  for any  $s$ . Let  $x$  be a realization of  $X$  and  $f_{1,x}(s) = f(s-x)^+$  be the corresponding function of interest. Next, we shall prove the existence of properties (2) and (3) for each  $s$  and each  $x$ , which implies the desired result.

Consider first the case when  $s < x$ . Here,

$$\begin{aligned} f_{1,x}^+(s) &= f(s+1-x)^+ - f(s-x)^+ = f(0) - f(0) = 0 \\ &= f(s-x)^+ - f(s-1-x)^+ = f_{1,x}^+(s-1) \end{aligned}$$

Clearly  $f_{1,x}^+(s) \leq f_{1,x}^+(s-1)$  and  $f_{1,x}^+(s) \leq 0$  for all  $s < x$ .

In the second instance,  $s = x$ . Similar arguments now yield

$$\begin{aligned} f_{1,x}^+(s) &= f(1) - f(0) \\ &\leq 0 = f(0) - f(0) = f_{1,x}^+(s-1) \end{aligned}$$

Again,  $f_{1,x}^+(s) \leq f_{1,x}^+(s-1)$  and  $f_{1,x}^+(s) \leq 0$  as desired.

The final instance has  $s > x$  resulting in the following comparisons.

$$\begin{aligned} f_{1,x}^+(s) &= f(s+1-x) - f(s-x) \\ &\leq f(s-x) - f(s-1-x) = f_{1,x}^+(s-1) \end{aligned}$$

Clearly,  $f_{1,x}^+(s) \leq f_{1,x}^+(s-1)$ . Moreover, because  $f_{1,x}^+(s) = f^+(s-x) \leq f^+(0) \leq 0$ , the function  $f_{1,x}$  is decreasing in its argument.

We have shown that  $f_1$  is bounded, and  $f_{1,x}$  is decreasing and has monotone decreasing differences for each realization  $x$  of  $X$ . This implies that  $f_1 \in \mathcal{F}$ .

Part (c):

From its definition,  $g_2(s) = (p+\pi)E(s \wedge X) + E[g(s-X)]$ , where  $g(s-x)$  is in  $\mathcal{G}$  for each realization  $x$  of  $X$ . Therefore,  $E[g(s-X)]$  also belongs to  $\mathcal{G}$ . We know that the sum of any two functions in

$\mathcal{G}$  is also in  $\mathcal{G}$ . Thus,  $g_2 \in \mathcal{G}$  will follow if  $\hat{g}(s) = (p + \pi)E(s \wedge X)$  is in  $\mathcal{G}$ . We show this to be the case by considering all three defining properties of functions in  $\mathcal{G}$ .

From the finiteness of  $E(X)$ , it follows that  $\hat{g}(\infty) = (p + \pi) \lim_{s \rightarrow \infty} E(s \wedge X) \rightarrow (p + \pi)E(X) < \infty$ . Moreover  $\hat{g}^+(s) = (p + \pi)P(X > s) \geq 0$  implies that  $\hat{g}$  is nondecreasing in  $s$ . Therefore  $\hat{g}(\infty) < \infty$  implies that  $\hat{g}(s) < \infty$  for all  $s$ . Next,  $\hat{g}^+(s) = (p + \pi)P(X > s) \leq (p + \pi)P(X > s-1) = \hat{g}^+(s-1)$ . That is,  $\hat{g}$  has monotone decreasing differences. Finally,  $\hat{g}^+(s) = (p + \pi)P(X > s) \leq (p + \pi)$ , which implies that there exists a  $\eta > (p + \pi)$  such that  $\hat{g}^+(s) < \eta$  for all  $s$ .

Part (d):

The claim in part (d) is a direct consequence of the fact that  $\mathcal{F} \subset \mathcal{G}$  and that the sum of any two functions in  $\mathcal{G}$  is also in  $\mathcal{G}$ .

Part (e):

It is straightforward to verify that multiplying by a positive fraction does not affect any of the three defining properties of the functions in  $\mathcal{F}$  and  $\mathcal{G}$ .

### PROOF OF PROPOSITION 2

First, we simplify and rearrange certain terms on the right hand side of (12) as shown below:

$$\begin{aligned}
-w \left( \sum_{m=1}^{\kappa} s_{m,n} \right) &+ (p+w) \left[ \sum_{j=1}^{\mu-1} q_{n-j} \wedge b_n \right] - w \sum_{j=1}^{\mu-1} q_{n-j} \\
&= -w\theta_n + w \left[ \sum_{j=1}^{\mu-1} q_{n-j} - b_n \right] + (p+w)b_n - (p+w) \left[ b_n - \sum_{j=1}^{\mu-1} q_{n-j} \right]^+ - w \sum_{j=1}^{\mu-1} q_{n-j} \\
&= -w\theta_n - (p+w) \left[ b_n - \sum_{j=1}^{\mu-1} q_{n-j} \right]^+ + pb_n \\
&= -w\theta_n - (p+w) \left[ (-\theta_n)^+ \right] + p \left[ b_n - \sum_{m=1}^{\kappa} s_{m,n} \right]^+ \\
&= -w\theta_n^+ - p \left[ (-\theta_n)^+ \right] + p \left[ -(\theta_n - \sum_{j=1}^{\mu-1} q_{n-j})^+ \right] \tag{40}
\end{aligned}$$

The last three equalities use the fact that  $b_n \cdot \sum_{m=1}^{\kappa} s_{m,n} = 0$ . Therefore,  $b_n = [b_n - \sum_{m=1}^{\kappa} s_{m,n}]^+$  and this allows us to conclude that  $[b_n - \sum_{j=1}^{\mu-1} q_{n-j}]^+ = (-\theta_n)^+$ . The last equality above is a direct consequence of the fact that  $a = a^+ - (-a)^+$  for any  $a$ . With these simplifications, the terminal

value function becomes

$$\begin{aligned}
v_n(\tilde{s}_n, \tilde{q}_{n-1}, b_n) &= u_1(\theta_n)^+ - w\theta_n^+ - u_2[(-\theta_n)^+] - p[(-\theta_n)^+] + p[-(\theta_n - \sum_{j=1}^{\mu-1} q_{n-j})]^+ \\
&\quad - w \sum_{j=1}^{\kappa} \hat{\alpha}_j \left( \sum_{m=j}^{\kappa} s_{m,n} \right)
\end{aligned} \tag{41}$$

The proof of Proposition 2 is by induction. Starting with  $t = n$ , we define

$$\begin{aligned}
f_{\kappa}^{(n)}(s) &\doteq -w\hat{\alpha}_1 s \\
f_{\kappa-j}^{(n)}(s) &\doteq -w\hat{\alpha}_{j+1} s, \quad \text{where } 1 \leq j < \kappa.
\end{aligned}$$

For each non-negative integer  $m$ , let

$$\hat{g}^{(n)}(s) \doteq u_1[(s)^+] - ws^+ - u_2[(-s)^+] - p[(-s)^+] + p(m-s)^+,$$

where  $s \in \mathcal{Z}$  is an arbitrary integer. [We abuse notation slightly here and treat  $\sum_{j=1}^{\mu-1} q_{n-j}$ , which are determined before period  $n$ , as a constant, although this term is also a part of  $\theta_n$ .] We shall argue next that  $\hat{g}^{(n)}(s) \in \mathcal{G}$ . A proof of this assertion involves considering three mutually exclusive and collective exhaustive cases, as shown below.

Case 1:  $s \geq m$

In this range of values of  $s$ ,  $\hat{g}^{(n)}(s) = u_1(s) - ws$ . This immediately implies that (a)  $\hat{g}^{(n)}(s) < \infty$ , being the sum of bounded functions, (b)  $\hat{g}^{(n)+}(s) = u_1^+(s) - w < 0$ , by the Proposition statement, and (c)  $\hat{g}^{(n)+}(s) - \hat{g}^{(n)+}(s-1) = u_1^+(s) - u_1^+(s-1) \leq 0$ , since  $u_2 \in \mathcal{G}$ . Therefore,  $\hat{g}^{(n)}(s) \in \mathcal{G}$ .

Case 2:  $s \in [0, m)$

Now  $\hat{g}^{(n)}(s) = u_1(s) - (p+w)s + pm$ . The following facts are easily verified: (a)  $\hat{g}^{(n)}(s) < \infty$ , since it is a sum of bounded functions (note  $m < \infty$ ), (b)  $\hat{g}^{(n)+}(s) = u_1^+(s) - (p+w) < 0$ , by the Proposition statement and the fact that  $p > 0$ , and (c)  $\hat{g}^{(n)+}(s) - \hat{g}^{(n)+}(s-1) = u_1^+(s) - u_1^+(s-1) \leq 0$ , since  $u_2 \in \mathcal{G}$ . Therefore,  $\hat{g}^{(n)}(s) \in \mathcal{G}$  when  $s \in [0, m)$ .

Case 3:  $s < 0$

Now  $\hat{g}^{(n)}(s) = -u_2(-s) + pm$ . Notice that  $\hat{g}^{(n)}(s)$  is the sum of functions in  $\mathcal{F}$  (being a constant,  $pm$

trivially belongs to  $\mathcal{F}$ ). Since the set  $\mathcal{F}$  is closed under summation,  $\hat{g}^{(n)}(s) \in \mathcal{F}$ , which immediately implies that  $\hat{g}^{(n)}(s) \in \mathcal{G}$  since  $\mathcal{F} \subset \mathcal{G}$ .

With the above functional definitions in hand, we rewrite terms on the right hand side of (12) in terms of functions  $f_j^{(n)}$  and  $g^{(n)}$ . The arguments of functions  $f_j^{(n)}$  are  $\sum_{m=\kappa-j+1}^{\kappa} s_{m,n}$  and the argument of  $g^{(n)}$  is  $\theta_n$  with the constant  $m = \sum_{j=1}^{\mu-1} q_{n-j}$ . These substitutions result in the following alternative representation of  $v_n$ .

$$v_n(\tilde{s}_n, \tilde{q}_{n-1}, b_n) = f_1^{(n)}(s_{\kappa,n}) + f_2^{(n)}(s_{\kappa,n} + s_{\kappa-1,n}) + \cdots + f_{\kappa}^{(n)}\left(\sum_{m=1}^{\kappa} s_{m,n}\right) + g^{(n)}(\theta_n).$$

So far, we have established that the terminal value function has the desired structure of equation (14).

Next we assume that the value function has the desired structure for time indices  $t+1, t+2, \dots, n$ , and prove that the structure is preserved in  $v_t$ . After substituting equation (7) and some straightforward algebraic manipulations, equation (11) can be rewritten as

$$\begin{aligned} v_t(\tilde{s}_t, \tilde{q}_{t-1}, b_t) &= -w \sum_{i=1}^{\kappa} \hat{\alpha}_i \left( \sum_{m=i}^{\kappa} s_{m,t} \right) - \pi E(D_t) + \max_{q_t \geq 0} E \left\{ (p + \pi) \left[ \left( \sum_{m=1}^{\kappa} s_{m,t} + q_{t-\mu+1} - b_t \right) \wedge D_t \right] \right. \\ &\quad \left. + p b_t - h \left( \sum_{m=1}^{\kappa} s_{m,t} + q_{t-\mu+1} - D_t - b_t \right)^+ + \beta v_{t+1}(\tilde{s}_{t+1}, \tilde{q}_t, b_{t+1}) \right\}. \end{aligned} \quad (42)$$

From the induction hypothesis,  $v_{t+1}$  can be written as the sum of functions of partial sums of  $\{s_{m,t+1}\}$  and  $b_{t+1}$ . Therefore, we first express these partial sums in terms of  $\{s_{m,t}\}$ . From equations (2) – (10) and the definition of  $\theta_t$ , we get:

$$\sum_{m=i}^{\kappa} s_{m,t+1} = \left( \sum_{m=i-1}^{\kappa} s_{m,t} - D_t \right)^+ \quad \text{for } i = 2, \dots, \kappa, \quad (43)$$

$$\sum_{m=1}^{\kappa} s_{m,t+1} - b_{t+1} = (q_{t-\mu+1} + \sum_{m=1}^{\kappa} s_{m,t} - D_t - b_t), \quad \text{and} \quad (44)$$

$$\theta_{t+1} = \theta_t + q_t - D_t. \quad (45)$$

Using the induction hypothesis, equations (42) – (45), and rearranging the resulting terms, we

get:

$$\begin{aligned}
v_t(\tilde{s}_t, \tilde{q}_{t-1}, b_t) &= -w \sum_{i=1}^{\kappa} \hat{\alpha}_i \left( \sum_{m=i}^{\kappa} s_{m,t} \right) - \pi E(D_t) + \beta E \{ f_1^{(t+1)} \left( \left( \sum_{m=\kappa-1}^{\kappa} s_{m,t} - D_t \right)^+ \right) \} + \dots \\
&+ f_{\kappa-1}^{(t+1)} \left( \left( \sum_{m=1}^{\kappa} s_{m,t} - D_t \right)^+ \right) \} + E \left\{ p b_t + (p + \pi) \left[ \left( \sum_{m=1}^{\kappa} s_{m,t} + q_{t-\mu+1} - b_t \right) \wedge D_t \right] \right. \\
&- \left. h \left( \sum_{m=1}^{\kappa} s_{m,t} + q_{t-\mu+1} - D_t - b_t \right)^+ + \beta f_{\kappa}^{(t+1)} \left( \left( \sum_{m=1}^{\kappa} s_{m,t} + q_{t-\mu+1} - D_t - b_t \right)^+ \right) \right\} \\
&+ \beta \max_{q_t \geq 0} E \{ g^{(t+1)}(\theta_t + q_t - D_t) \}. \tag{46}
\end{aligned}$$

From parts (b) and (e) of Lemma 1, we can conclude that for each  $i = 1, \dots, \kappa - 1$ , the functions  $\beta E \{ f_i^{(t+1)} \left( \left( \sum_{m=\kappa-i}^{\kappa} s_{m,t} - D_t \right)^+ \right) \} \in \mathcal{F}$ . Moreover, for each  $i = 1, \dots, \kappa$ , the function  $-w \hat{\alpha}_i \sum_{m=i}^{\kappa} s_{m,t}$  is a decreasing linear function of  $\sum_{m=i}^{\kappa} s_{m,t}$ , and hence belongs to the set  $\mathcal{F}$ . Next, we define the following new functions:

$$f_1^{(t)}(s_{\kappa,t}) \doteq -w \hat{\alpha}_1 s_{\kappa,t} - \pi E(D_t), \quad \text{and} \tag{47}$$

$$f_i^{(t)} \left( \sum_{m=\kappa-i+1}^{\kappa} s_{m,t} \right) \doteq -w \hat{\alpha}_{\kappa-i+1} \left( \sum_{m=\kappa-i+1}^{\kappa} s_{m,t} \right) + \beta E \{ f_{i-1}^{(t+1)} \left[ \left( \sum_{m=\kappa-i+1}^{\kappa} s_{m,t} - D_t \right)^+ \right] \}, \tag{48}$$

for each  $i = 2, \dots, \kappa$ . Since the set  $\mathcal{F}$  is closed under summation, this implies that each  $f_i^{(t)}$  also belongs to  $\mathcal{F}$ .

We now turn our attention to the remaining terms in equation (46). From arguments similar to those leading up to equation (40), we can rewrite the term  $p b_t + p E \left[ \left( \sum_{m=1}^{\kappa} s_{m,t} + q_{t-\mu+1} - b_t \right) \wedge D_t \right]$  as follows:

$$\begin{aligned}
& p b_t + p E \left[ \left( \sum_{m=1}^{\kappa} s_{m,t} + q_{t-\mu+1} - b_t \right) \wedge D_t \right] \\
&= p b_t + p \left( \sum_{m=1}^{\kappa} s_{m,t} + q_{t-\mu+1} - b_t \right) - p E \left[ \left( \sum_{m=1}^{\kappa} s_{m,t} + q_{t-\mu+1} - b_t - D_t \right)^+ \right] \\
&= p(\theta_t + b_t - \sum_{j=1}^{\mu-2} q_{t-j}) - p E \left[ \left( \theta_t - \sum_{j=1}^{\mu-2} q_{t-j} - D_t \right)^+ \right].
\end{aligned}$$

From arguments used to prove part (c) of Lemma 1, it follows that the function  $\hat{g}^{(t)}(\theta_t) \doteq \pi E \left[ \left( \theta_t - \sum_{j=1}^{\mu-2} q_{t-j} \right) \wedge D_t \right] + p(\theta_t + b_t - \sum_{j=1}^{\mu-2} q_{t-j})$  belongs to  $\mathcal{G}$ . It is also straightforward to check that

$E[-(h+p)(\theta_t - \sum_{j=1}^{\mu-2} q_{t-j} - D_t)^+]$  is decreasing and has monotone decreasing differences in  $\theta_t$ . Therefore, this function belongs to the set  $\mathcal{F}$ . Moreover, since  $\mathcal{F}$  is closed under the sum, this means  $\hat{f}_\kappa^{(t)}(\theta_t) = E\{-(h+p)(\theta_t - \sum_{j=1}^{\mu-2} q_{t-j} - D_t)^+ + \beta f_\kappa^{(t+1)}((\theta_t - \sum_{j=1}^{\mu-2} q_{t-j} - D_t)^+)\}$  also belongs to the set  $\mathcal{F}$ . The previous statement makes use of parts (b) and (e) of Lemma 1.

We define a function  $\bar{g}^{(t)}(\theta_t) \doteq \beta \max_{q_t \geq 0} E\{g^{(t+1)}(\theta_t + q_t - D_t)\}$ . Then, from part (a) and (e) of Lemma 1,  $\bar{g}^{(t)} \in \mathcal{G}$ . Since sum of functions in  $\mathcal{G}$  is also in  $\mathcal{G}$ , it follows that  $g^{\dagger(t)}(\theta_t) = \hat{g}^{(t)}(\theta_t) + \bar{g}^{(t)}(\theta_t)$  also belongs to  $\mathcal{G}$ . Finally, using part (d) of Lemma 1, we conclude that  $g^{(t)}(\theta_t) = g^{\dagger(t)}(\theta_t) + \hat{f}_\kappa^{(t)}(\theta_t)$  belongs to the set  $\mathcal{G}$ . Now, from equations (46), (47) and (48), and the arguments above, we obtain equation (14). Hence proved. #
